# Supplementary material for: Climate change risk to forests in China associated with warming
Source: PubMed Central journal article supplement (PMC5765107; doi:10.1038/s41598-017-18798-6), 2018-01-11
Supplement: 41598_2017_18798_MOESM1_ESM.pdf [file 41598_2017_18798_MOESM1_ESM.pdf]

# **Climate change risk to forests in China associated with warming**

**Yunhe Yin<sup>1,\*</sup>, Danyang Ma<sup>1,2</sup>, Shaohong Wu<sup>1,2</sup>**

<sup>1</sup> Key Laboratory of Land Surface Pattern and Simulation, Institute of Geographic Sciences and Natural Resources Research, Chinese Academy of Sciences, 11A, Datun Road, Chaoyang District, Beijing 100101, China

<sup>2</sup> University of Chinese Academy of Sciences, 19A Yuquan Road, Shijingshan District, Beijing 100049, China

\* Corresponding author

E-mail: yinyh@igsnr.ac.cn

## **Contents of this file**

Figure S1

Figure S2

Figure S3

Figure S4

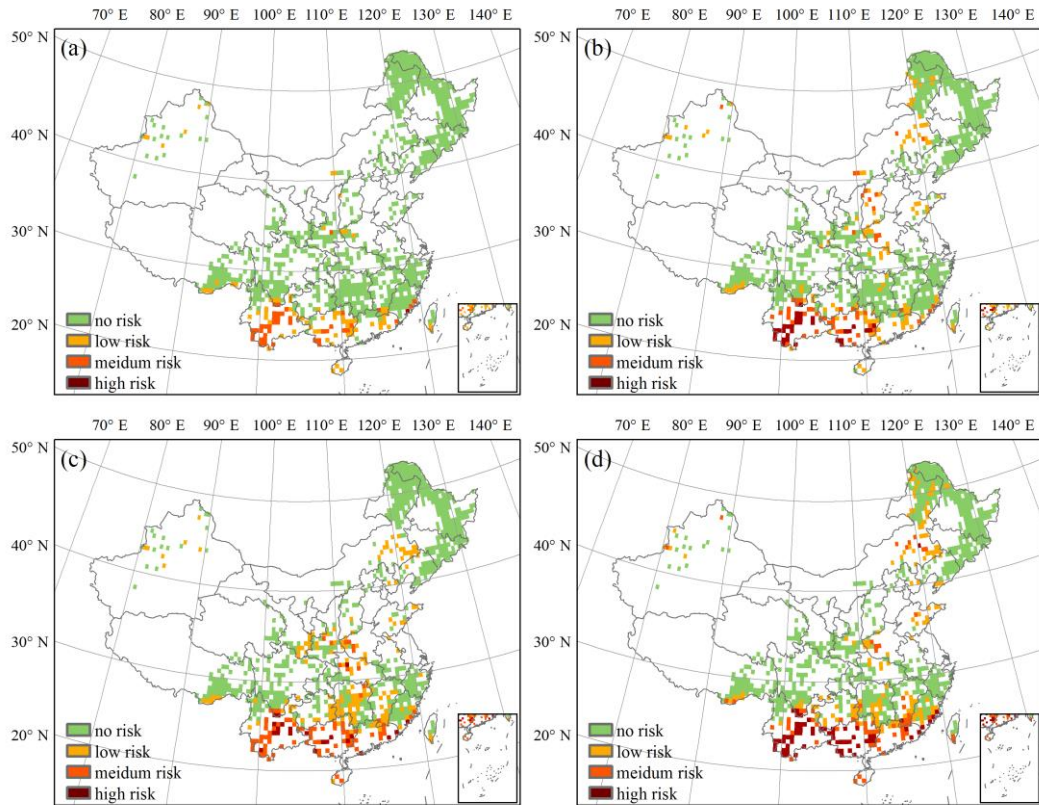

**Figure S1.** Distribution of forest area at risk in China from 2031 to 2060 under (a) RCP2.6, (b) RCP4.5, (c) RCP6.0, and (d) RCP8.5. The figure was generated using ArcGIS 10.1 software (<http://www.esri.com/>).

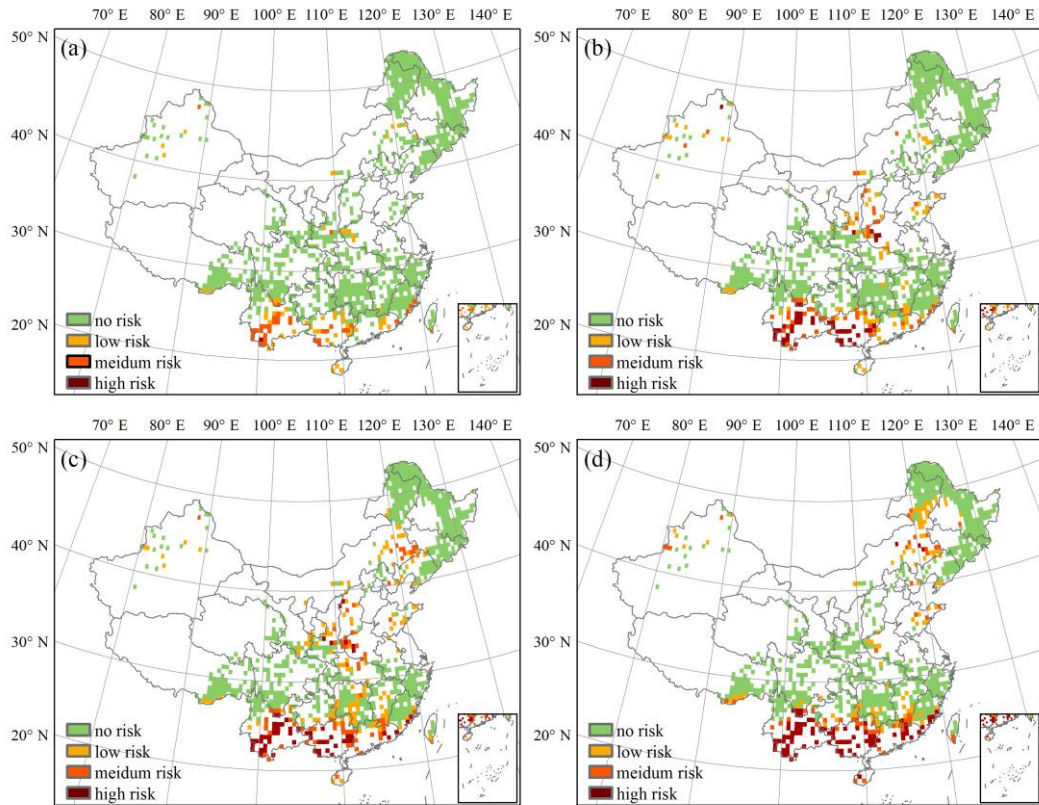

**Figure S2.** Distribution of forest area at risk in China from 2041 to 2070 under (a) RCP2.6, (b) RCP4.5, (c) RCP6.0, and (d) RCP8.5. The figure was generated using ArcGIS 10.1 software (<http://www.esri.com/>).

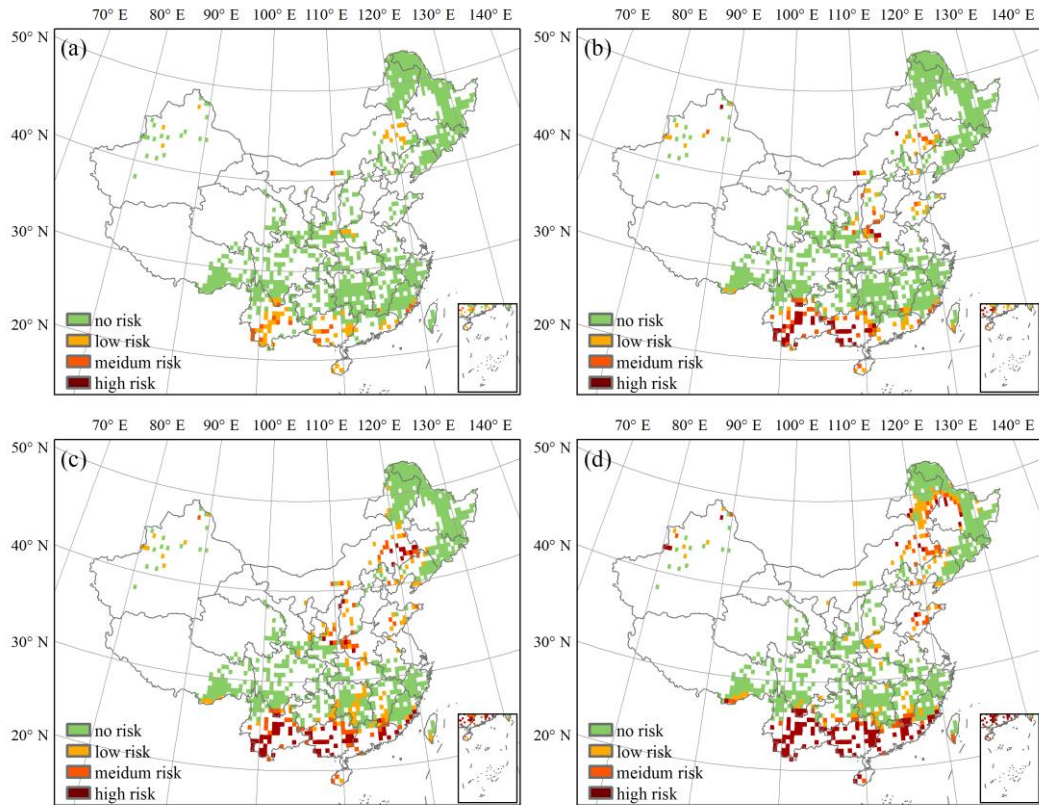

**Figure S3.** Distribution of forest area at risk in China from 2051 to 2080 under (a) RCP2.6, (b) RCP4.5, (c) RCP6.0, and (d) RCP8.5. The figure was generated using ArcGIS 10.1 software (<http://www.esri.com/>).

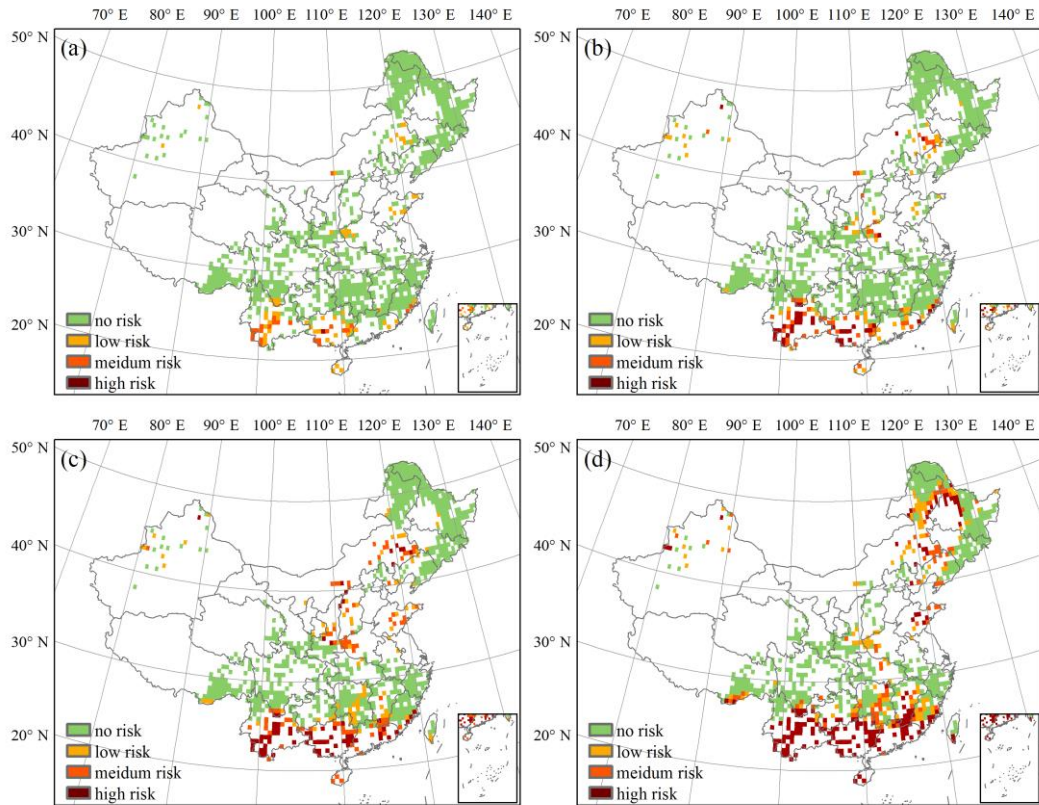

**Figure S4.** Distribution of forest area at risk in China from 2061 to 2090 under (a) RCP2.6, (b) RCP4.5, (c) RCP6.0, and (d) RCP8.5. The figure was generated using ArcGIS 10.1 software (<http://www.esri.com/>).
